# Supplementary material
Source: PubMed Central journal article supplement (PMC2978564)
Supplement: supp_M110.137661_jbc.M110.137661-2.pdf [file supp_M110.137661_jbc.M110.137661-2.pdf]

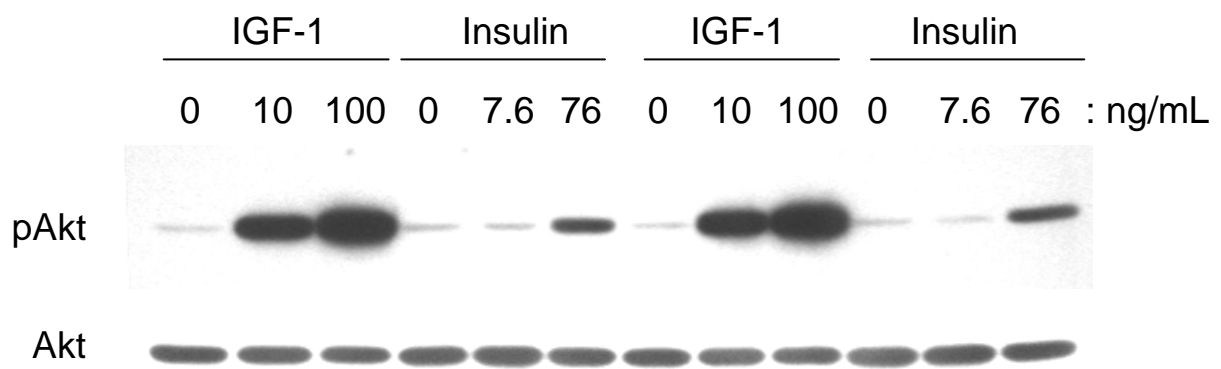

Supplemental Figure 1

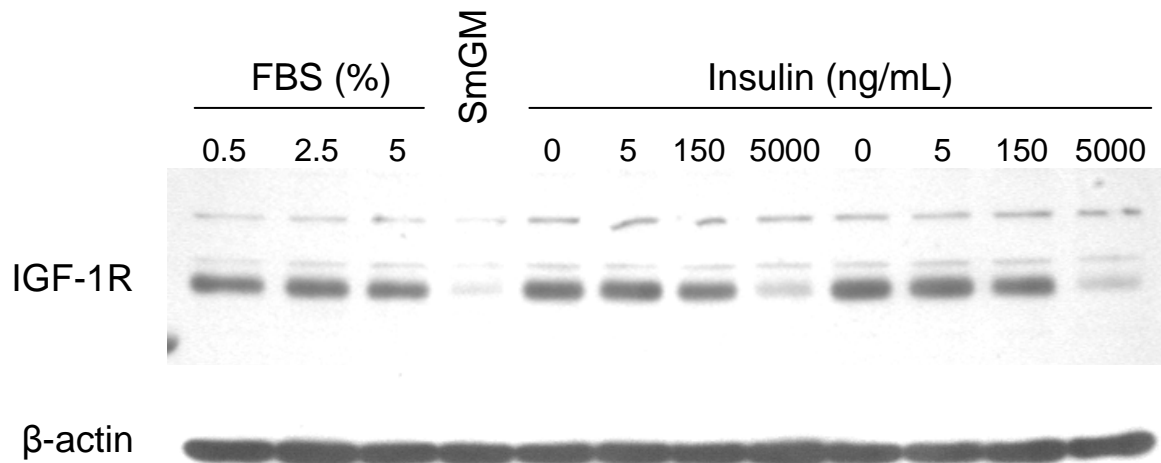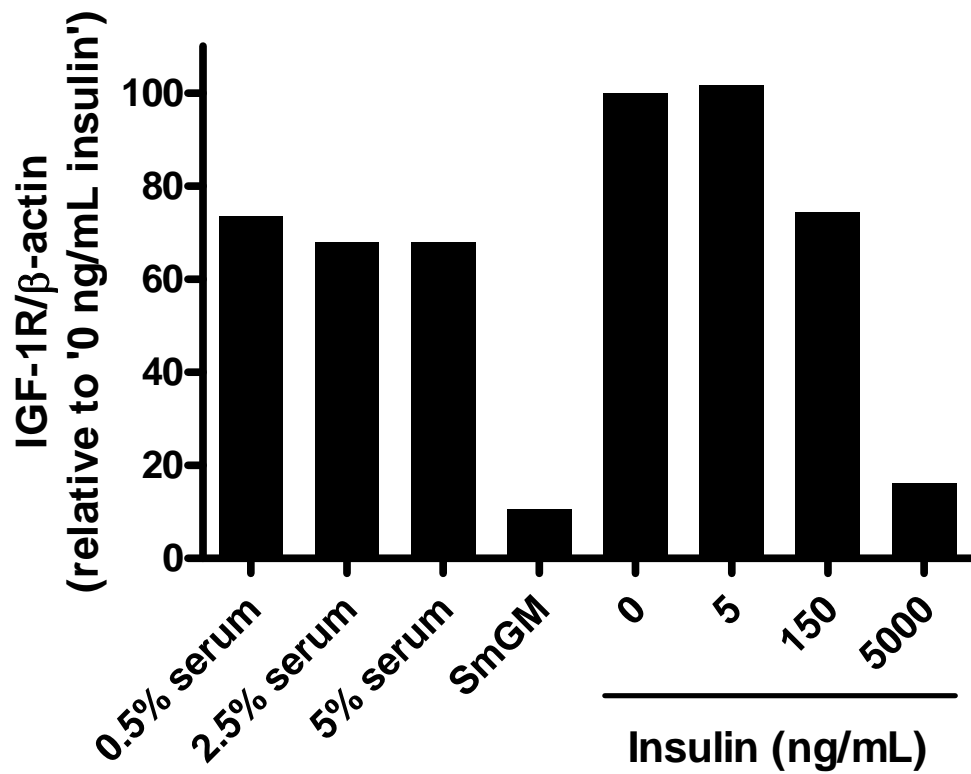

Supplemental Figure 2

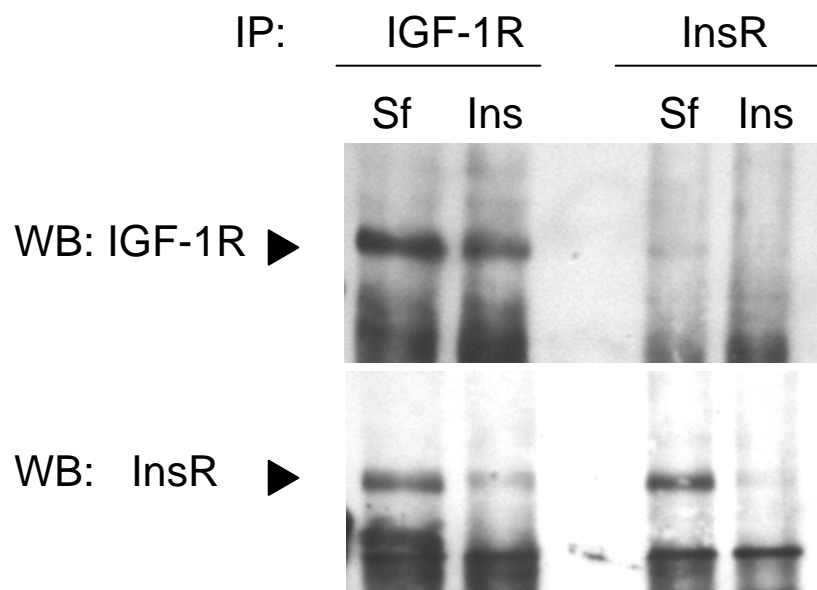

Supplemental Figure 3

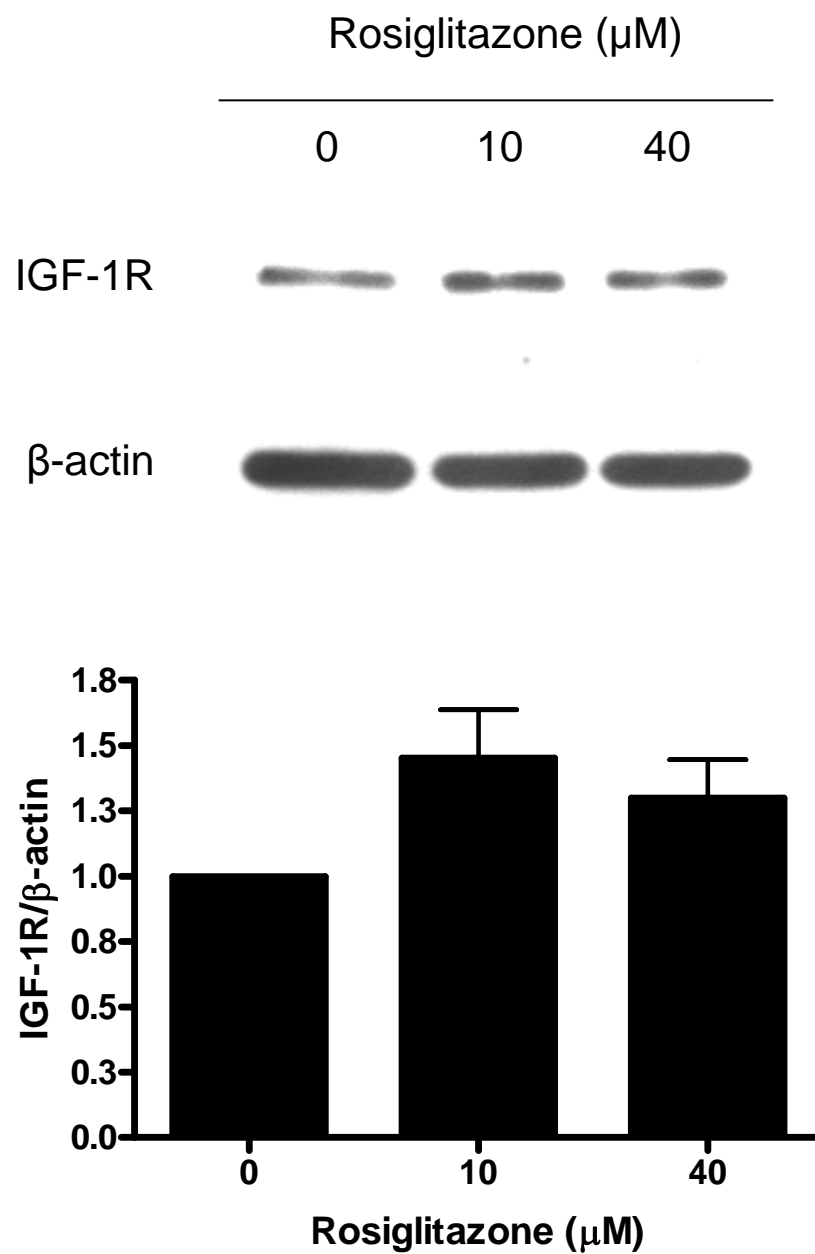

Supplemental Figure 4

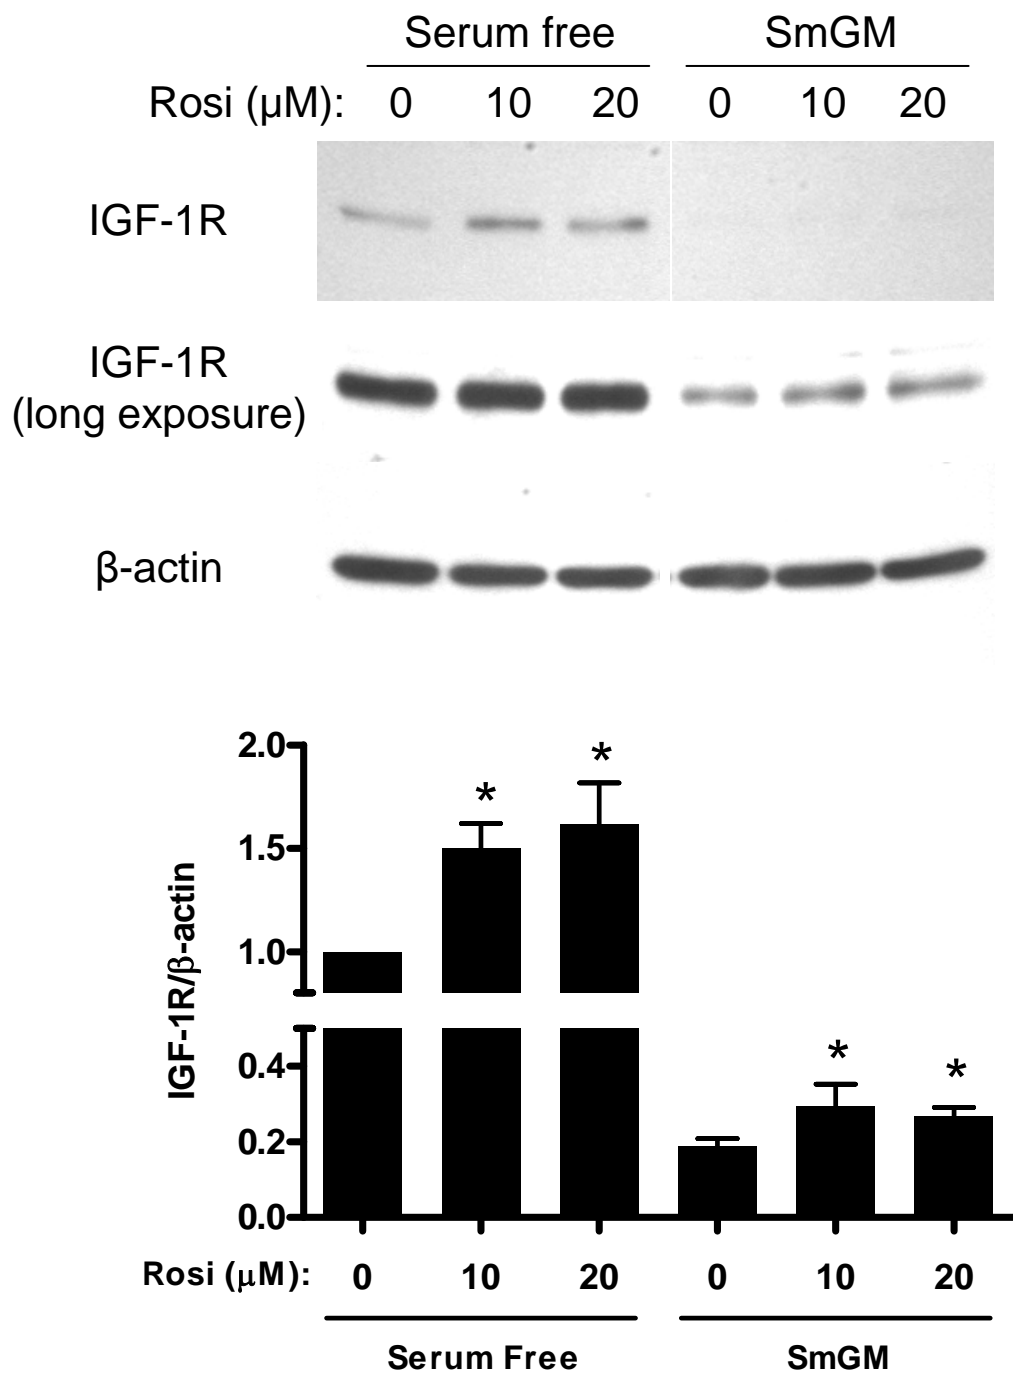

Supplemental Figure 5

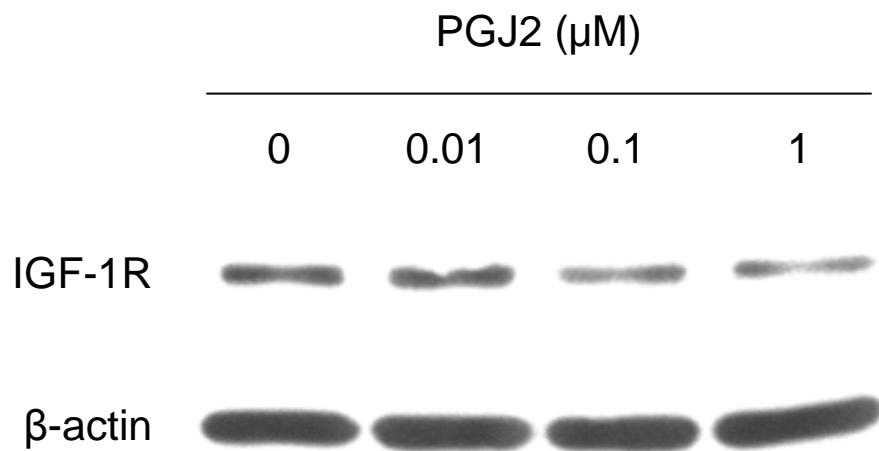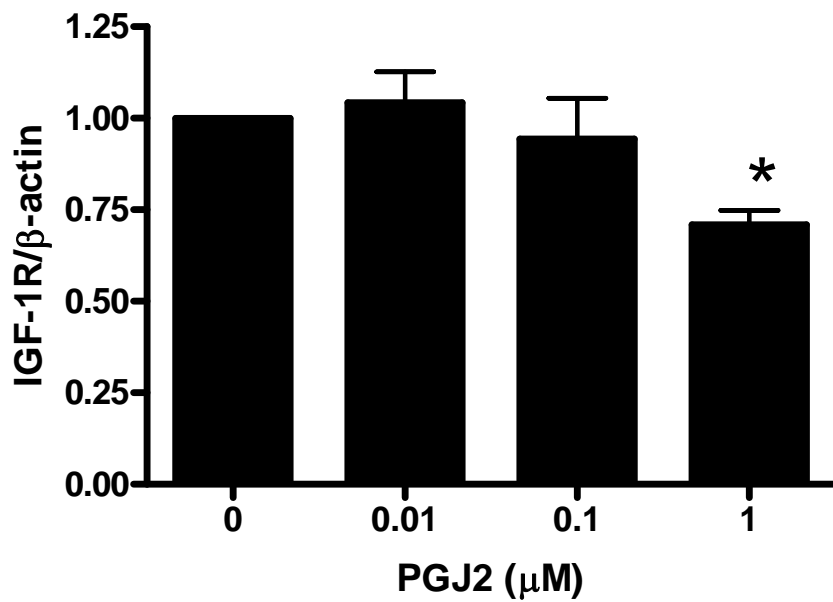

Supplemental Figure 6

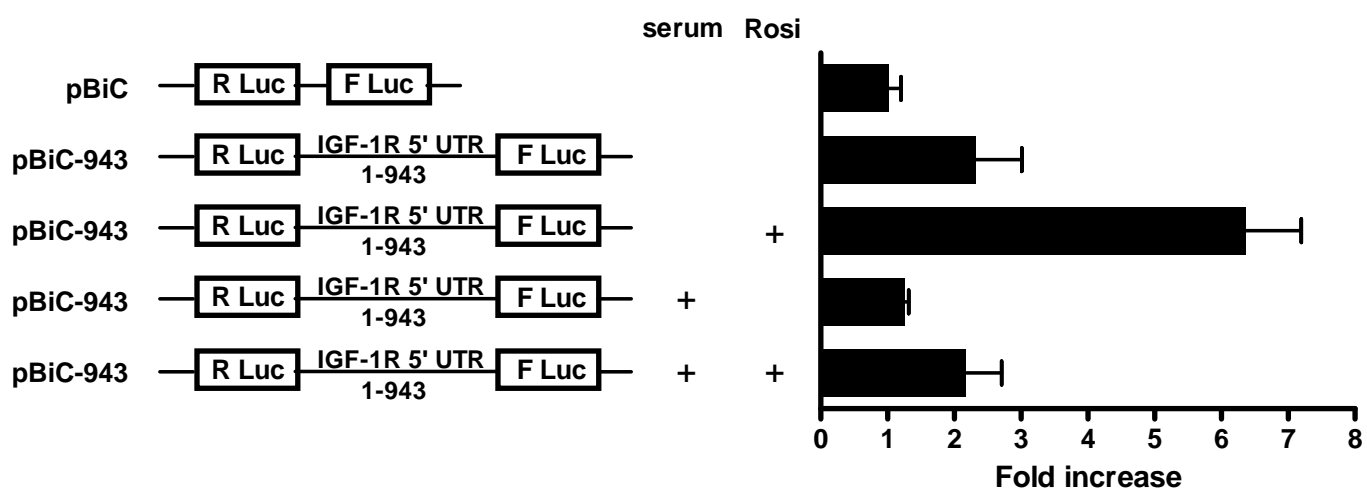

Supplemental Figure 7
